# Supplementary material for: Tumor-wide RNA splicing aberrations generate immunogenic public neoantigens
Source: Research Square preprint supplement (doi:10.21203/rs.3.rs-3496988/v1), 2023-11-16
Supplement: Supplementary file 4 [file f8c293a36a2fa328fe219c6b.xlsx]

## Sheet: COAD (Joung)
junc.id
chr1:-:101467100-101479265
chr1:-:120341181-120342347
chr1:-:120345788-120345937
chr1:-:120351478-120354031
chr1:-:152006262-152009388
chr1:-:153507303-153507677
chr1:-:153507794-153508424
chr1:-:153507836-153508592
chr1:-:207113929-207119612
chr1:-:212002665-212003524
chr1:-:2338391-2339890
chr1:-:45984726-45987306
chr1:-:6246770-6252989
chr1:+:23208976-23219469
chr1:+:24020403-24022287
chr1:+:93300470-93306107
chr1:+:989931-990756
chr10:-:12214865-12219791
chr10:-:126677954-126678070
chr10:-:75006557-75006767
chr10:+:60148583-60150527
chr10:+:74644140-74645506
chr10:+:79794179-79795109
chr10:+:79798033-79799961
chr10:+:95259842-95262869
chr11:+:130068313-130068841
chr11:+:34673157-34678457
chr11:+:45830121-45832326
chr11:+:66264948-66276549
chr11:+:66276785-66276881
chr12:-:53292303-53292456
chr12:-:53298811-53301039
chr12:-:53298811-53335581
chr12:+:113349063-113354313
chr12:+:132416857-132425836
chr12:+:54677751-54678023
chr12:+:56510583-56510977
chr12:+:56510583-56510981
chr12:+:6309731-6310058
chr13:-:30127997-30169280
chr13:-:45911523-45912796
chr13:-:45911538-45912794
chr13:-:45913681-45914128
chr13:+:27827980-27830320
chr13:+:43629679-43633033
chr14:-:50085844-50087279
chr16:+:88925197-88926070
chr17:-:38643709-38644797
chr17:-:46692617-46694806
chr17:-:46694865-46694998
chr17:-:46700497-46708098
chr17:-:74013960-74014241
chr17:-:76170866-76171130
chr17:+:4433177-4433926
chr18:-:28671101-28672063
chr19:-:39297235-39303481
chr19:-:39303095-39303481
chr19:-:3978005-3979326
chr19:-:39924058-39924304
chr19:-:46216831-46220522
chr19:-:51522398-51522882
chr19:+:17970783-17972902
chr19:+:2269883-2271383
chr19:+:36139305-36145472
chr19:+:49994804-49994987
chr19:+:49999728-49999892
chr19:+:49999728-50000776
chr19:+:50000011-50000450
chr19:+:50000064-50000450
chr19:+:54710330-54710479
chr19:+:54710330-54711238
chr19:+:5690345-5690516
chr19:+:8386458-8386539
chr19:+:8386979-8387155
chr2:-:219001-224867
chr2:-:230044-231086
chr2:-:55494771-55495785
chr2:+:135119715-135119845
chr2:+:223799405-223806218
chr2:+:232577226-232577498
chr2:+:27665307-27666264
chr2:+:55462098-55462545
chr2:+:85132842-85133094
chr2:+:85133241-85133394
chr2:+:85133241-85133478
chr2:+:85133241-85133489
chr2:+:97490938-97493467
chr20:-:6100386-6103420
chr20:+:30327424-30345209
chr20:+:44443109-44444492
chr20:+:55949857-55951234
chr20:+:55951322-55953068
chr21:-:43733741-43735404
chr22:+:37964369-37964411
chr3:-:122084313-122087022
chr3:-:12881741-12882268
chr3:-:12882455-12882992
chr3:-:52028142-52029101
chr3:-:53875026-53879848
chr3:+:32493965-32495738
chr4:+:152024231-152025623
chr4:+:154125712-154191489
chr5:-:60458183-60458272
chr5:-:81572337-81573513
chr5:+:85915316-85916484
chr6:-:150141839-150157220
chr6:-:1690808-1726649
chr6:-:30168900-30172432
chr6:-:31322326-31322409
chr6:-:34392632-34392848
chr6:-:52129287-52129421
chr6:+:33243660-33243717
chr6:+:33243843-33244167
chr7:-:2275199-2279164
chr7:-:35058208-35076708
chr7:-:56170704-56174056
chr7:-:73151021-73151398
chr7:+:2696168-2696777
chr7:+:32598240-32598834
chr7:+:36459076-36459777
chr7:+:44839079-44840885
chr7:+:44839479-44840885
chr8:-:101724685-101725314
chr8:-:11704125-11704560
chr8:-:77896429-77898422
chr8:+:101225656-101232506
chr9:-:115030475-115060120
chr9:-:130211800-130211888
chr9:-:130211987-130213559
chr9:-:130213083-130213563
chr9:-:19376587-19378365
chr9:-:19378916-19379460
chr9:-:19379597-19380187
chr9:+:130911942-130912522
chr9:+:130913271-130913916
chr9:+:130913402-130913916
chr9:+:130914563-130915346
chr9:+:136217174-136217427
chrX:-:100099067-100104760
chrX:-:100105375-100117159
chrX:-:108926604-108976367
chrX:-:128945485-128947636
chrX:-:23897151-23925810
chrX:-:2853231-2854799
chrX:-:2861240-2871183
chrX:-:71493258-71493650
chrX:-:71495024-71495393
chrX:+:100646333-100646446
chrX:+:100646810-100650715

## Sheet: GBM LGG (Costello)
junc.id
chr1:-:109822778-109823398
chr1:-:109823111-109823391
chr1:-:109823630-109823729
chr1:-:109825411-109825684
chr1:-:112031489-112032088
chr1:-:112031646-112032323
chr1:-:153507303-153507677
chr1:-:156383289-156383875
chr1:-:156384545-156396233
chr1:-:156385262-156391346
chr1:-:156396661-156399167
chr1:-:156397852-156399167
chr1:-:156642031-156643245
chr1:-:156643319-156643493
chr1:-:175365839-175372275
chr1:-:175614001-175712361
chr1:-:180962561-180974355
chr1:-:183942848-183944230
chr1:-:183947654-184005273
chr1:-:183947654-184006714
chr1:-:203148553-203148674
chr1:-:203151971-203152768
chr1:-:212538718-212550903
chr1:-:212912028-212939530
chr1:-:225755116-225840019
chr1:-:31343002-31343151
chr1:-:32205635-32205947
chr1:-:32207818-32210248
chr1:-:44476554-44482126
chr1:-:62951324-62953068
chr1:-:70650597-70671072
chr1:+:109419850-109439485
chr1:+:11585369-11586765
chr1:+:11589743-11589823
chr1:+:11590016-11590968
chr1:+:1335629-1335984
chr1:+:13910595-13912087
chr1:+:13912209-13933667
chr1:+:151255794-151258750
chr1:+:156615937-156616766
chr1:+:156616798-156616898
chr1:+:156616898-156618604
chr1:+:160181506-160182975
chr1:+:200709094-200776503
chr1:+:201816766-201821231
chr1:+:218607790-218609426
chr1:+:240351562-240421244
chr1:+:240374535-240402938
chr1:+:243635353-243636943
chr1:+:243635353-243637528
chr1:+:243635353-243652315
chr1:+:243637064-243637528
chr1:+:243637713-243639232
chr1:+:244998635-244998777
chr1:+:35791006-35835629
chr1:+:38261518-38265515
chr1:+:40432841-40433475
chr1:+:79094684-79101021
chr1:+:79101174-79102779
chr1:+:986474-986632
chr10:-:25226296-25241456
chr10:-:25240536-25241456
chr10:-:98763921-98764449
chr10:+:122280607-122348814
chr10:+:134912267-134940736
chr10:+:76349075-76429940
chr10:+:93588163-93593609
chr11:-:16133472-16205431
chr11:-:17553089-17565818
chr11:-:46898862-46900457
chr11:-:46905527-46907875
chr11:-:63679651-63680147
chr11:-:63681805-63681888
chr11:-:64445598-64453117
chr11:-:64457945-64460318
chr11:-:72712179-72794739
chr11:-:77383236-77386080
chr11:-:95826681-96076071
chr11:+:113076388-113076776
chr11:+:120707553-120744774
chr11:+:120744927-120745851
chr11:+:120833307-120837903
chr11:+:125267958-125298907
chr11:+:1471066-1471450
chr11:+:35641463-35641923
chr11:+:61486477-61487583
chr11:+:70208594-70218317
chr12:-:10569366-10570209
chr12:-:10586492-10587084
chr12:-:123751829-123752015
chr12:-:123751829-123752184
chr12:-:124915327-124922475
chr12:-:124950826-124957497
chr12:-:124979914-125002702
chr12:-:2973921-2975558
chr12:-:54577743-54580676
chr12:-:70081239-70087508
chr12:+:110152702-110205816
chr12:+:50452005-50452533
chr12:+:51054102-51068256
chr12:+:51069234-51072461
chr12:+:51077013-51079615
chr12:+:56510443-56511265
chr12:+:6646556-6646756
chr12:+:70150443-70188216
chr12:+:70189335-70193988
chr13:-:107823134-107824876
chr13:-:107824922-107862931
chr13:+:58240660-58240797
chr14:-:21491480-21493442
chr14:-:26936135-26941525
chr14:+:23846269-23846399
chr14:+:24631099-24631352
chr14:+:54982111-54989171
chr14:+:94087387-94088122
chr15:-:23021429-23026021
chr15:-:30003204-30004563
chr15:-:30004614-30008814
chr15:-:64448341-64448923
chr15:-:66198479-66204419
chr15:-:66208614-66210303
chr15:-:85200773-85201226
chr15:+:51975631-51980465
chr15:+:57356021-57364850
chr15:+:57543621-57545462
chr15:+:57544690-57545462
chr15:+:99666824-99666926
chr16:-:23430148-23431711
chr16:-:3819354-3823751
chr16:-:69152428-69155338
chr16:+:19179983-19184076
chr16:+:30762580-30764552
chr17:-:26902352-26902442
chr17:-:27287991-27290794
chr17:-:27290872-27290979
chr17:-:37561462-37566833
chr17:-:39959231-39963047
chr17:-:4110870-4111227
chr17:-:42985510-42987982
chr17:-:42988752-42989055
chr17:-:42988791-42989039
chr17:-:42988803-42989039
chr17:-:42991456-42992404
chr17:-:5403270-5404154
chr17:-:55946554-55950023
chr17:+:29645742-29652837
chr17:+:29689382-29701030
chr17:+:30593319-30615810
chr17:+:5977390-5983690
chr17:+:5998543-6021307
chr18:-:19263926-19266585
chr18:+:33552870-33554902
chr19:-:17732679-17735637
chr19:-:19016438-19016901
chr19:-:3978005-3979326
chr19:-:50312515-50314619
chr19:-:50413141-50432673
chr19:-:51960960-51961187
chr19:-:8032584-8038608
chr19:+:11107056-11107172
chr19:+:19329890-19330073
chr19:+:39993685-39994710
chr19:+:39995928-39996037
chr19:+:4283239-4284782
chr19:+:45411859-45412312
chr19:+:49993179-49993496
chr19:+:49994804-49994987
chr19:+:50213741-50215065
chr19:+:5036468-5039846
chr2:-:10826178-10829921
chr2:-:128608259-128615601
chr2:-:165996118-165997211
chr2:-:165996118-165997294
chr2:-:198437001-198460714
chr2:-:198498670-198508881
chr2:-:220430236-220431994
chr2:-:239147892-239148151
chr2:-:240274613-240322385
chr2:-:29075365-29092444
chr2:+:131688552-131688663
chr2:+:154801152-154869577
chr2:+:154997018-155018316
chr2:+:155102495-155157921
chr2:+:155265555-155295103
chr2:+:16081175-16082069
chr2:+:187490314-187495526
chr2:+:209210871-209214747
chr2:+:210289000-210444759
chr2:+:220397661-220398039
chr2:+:220398284-220399892
chr2:+:242755882-242756045
chr2:+:54284497-54333410
chr2:+:62147782-62227835
chr20:-:35425970-35431258
chr20:-:6065934-6068455
chr20:-:6068530-6075585
chr20:-:6077641-6078170
chr20:-:62070043-62070950
chr20:+:30135495-30137866
chr20:+:30327424-30345209
chr20:+:4153809-4155676
chr20:+:42876154-42885741
chr20:+:44443109-44444492
chr20:+:53092724-53171471
chr20:+:57485456-57485739
chr20:+:6749522-6750818
chr20:+:6749522-6758891
chr21:+:22907013-22910166
chr22:-:36897454-36900561
chr22:-:41175129-41215198
chr22:-:41634889-41636877
chr22:+:26747209-26769416
chr22:+:26761532-26771546
chr22:+:26769449-26771546
chr22:+:29611619-29627008
chr3:-:120054800-120067069
chr3:-:120067161-120067590
chr3:-:122629892-122630766
chr3:-:125831723-125836870
chr3:-:125844564-125854377
chr3:-:145791139-145796902
chr3:-:15137795-15138058
chr3:-:186954355-186961271
chr3:-:195029566-195033675
chr3:-:195033696-195041429
chr3:-:66467690-66512861
chr3:-:66502057-66550613
chr3:-:9569387-9593957
chr3:+:115395457-115439649
chr3:+:119118108-119120728
chr3:+:121658342-121659677
chr3:+:147125272-147130304
chr3:+:183415998-183432931
chr3:+:40567355-40569696
chr3:+:53890477-53890870
chr3:+:9473438-9475053
chr4:-:105413216-105415662
chr4:-:146682750-146684553
chr4:-:146684620-146686139
chr4:-:36069900-36081837
chr4:-:7780603-7783300
chr4:-:85676553-85678123
chr4:+:110605705-110606406
chr4:+:113782291-113825610
chr4:+:115520213-115544034
chr4:+:152024231-152025623
chr4:+:57319927-57322278
chr4:+:57322400-57325537
chr5:-:9423350-9437867
chr5:-:9437964-9545427
chr5:+:140855713-140856097
chr5:+:140855713-140856537
chr5:+:140855713-140857960
chr5:+:148617166-148619321
chr6:-:10984139-11000319
chr6:-:111887763-111888001
chr6:-:131191521-131206235
chr6:-:131199390-131206235
chr6:-:150049614-150052748
chr6:-:159190976-159191082
chr6:-:56462804-56464866
chr6:+:102337629-102372475
chr6:+:32822066-32822855
chr6:+:32822917-32823914
chr6:+:39869855-39870535
chr6:+:41041330-41046767
chr6:+:97533217-97561662
chr7:-:107791151-107799907
chr7:-:107800937-107820666
chr7:-:107808847-107816874
chr7:-:107875132-107953108
chr7:-:107953175-108002593
chr7:-:108002663-108039879
chr7:-:134853812-134855027
chr7:-:13935642-13940362
chr7:-:13950929-13971126
chr7:-:13975508-13978741
chr7:-:14017100-14025740
chr7:-:14027798-14028083
chr7:-:157361658-157361752
chr7:-:157475629-157483243
chr7:-:158852423-158852483
chr7:-:32527369-32528864
chr7:-:4960087-4965081
chr7:-:4965163-4998136
chr7:-:56110336-56110840
chr7:-:56110336-56118830
chr7:-:5692141-5742700
chr7:-:6045657-6048627
chr7:-:73657576-73657806
chr7:-:75228565-75268368
chr7:+:100453459-100456456
chr7:+:103969672-104170650
chr7:+:121644714-121650390
chr7:+:121679642-121680878
chr7:+:12264011-12270014
chr7:+:2566555-2567172
chr7:+:32598240-32598834
chr7:+:36196058-36278593
chr7:+:55087058-55223522
chr7:+:55225446-55231425
chr7:+:55275234-55275306
chr7:+:65751696-65821811
chr7:+:65751696-65824881
chr7:+:65821858-65823785
chr7:+:73721811-73731809
chr7:+:8099878-8110712
chr7:+:87563865-87564343
chr7:+:87797542-87810819
chr7:+:87811339-87825785
chr8:-:103291394-103292621
chr8:-:125565927-125567982
chr8:-:125568595-125570953
chr8:-:131880192-131916017
chr8:-:41834845-41836180
chr8:-:48771541-48772171
chr8:+:123875778-123985481
chr8:+:136498415-136533479
chr8:+:1733807-1733897
chr8:+:30496156-30502026
chr8:+:30502089-30502962
chr8:+:61773684-61774757
chr8:+:61773684-61774787
chr8:+:64081373-64081945
chr8:+:98703416-98708431
chr8:+:98708521-98711981
chr9:-:101258796-101300827
chr9:-:107573161-107574854
chr9:-:107578626-107579506
chr9:-:117810811-117835881
chr9:-:119903754-119976636
chr9:-:123622434-123623366
chr9:-:125618157-125620947
chr9:-:131607690-131644181
chr9:-:136915671-136916683
chr9:-:139959239-139959529
chr9:-:139960826-139964155
chr9:-:139964245-139964341
chr9:-:14120623-14125633
chr9:-:14179779-14307212
chr9:-:19376587-19378365
chr9:-:6533160-6534066
chr9:-:8485327-8485761
chr9:-:91657099-91660648
chr9:-:91672746-91680443
chr9:+:126118633-126125304
chr9:+:126134594-126135412
chr9:+:131267183-131269494
chr9:+:135037626-135040913
chr9:+:136325309-136328528
chr9:+:139243219-139244044
chr9:+:34989828-34990667
chr9:+:71861706-71865950
chr9:+:96415647-96416799
chr9:+:96420518-96422473
chrX:-:110544971-110574131
chrX:-:110544971-110574146
chrX:-:119402242-119418981
chrX:-:128782769-128788255
chrX:-:135758876-135761693
chrX:-:135761831-135762889
chrX:-:135819623-135819750
chrX:-:135819819-135825743
chrX:-:151337032-151358201
chrX:-:151337035-151366104
chrX:-:41646536-41712349
chrX:-:53448990-53449440
chrX:-:67267005-67272381
chrX:-:76944417-76949312
chrX:-:76944417-76952064
chrX:-:80373987-80374228
chrX:-:99957103-99959806
chrX:+:106773741-106788966
chrX:+:106789071-106789384
chrX:+:106789506-106793278
chrX:+:135112052-135112290
chrX:+:150153098-150154067
chrX:+:70364814-70367912
chrX:+:70384178-70389103
chrX:+:84502078-84502552

## Sheet: KICH (Joung)
junc.id
chr1:+:24020403-24022287
chr11:+:46695662-46695765
chr12:+:56510583-56510977
chr16:+:88925197-88926070
chr18:-:47017297-47017886
chr19:+:49994804-49994987
chr3:-:12881741-12882268
chr3:-:52028142-52029101
chr9:-:19376587-19378365
chr9:-:19378916-19379460
chr9:-:19379597-19380187
chr1:-:36897461-36898022
chr10:-:129676684-129690819
chr19:-:6730395-6730532
chr8:+:30356857-30361802

## Sheet: LIHC (Joung)
junc.id
chr1:-:161192840-161193135
chr1:-:161193247-161193384
chr1:-:225594534-225599038
chr1:-:235299082-235299348
chr1:+:226019614-226030114
chr1:+:226027671-226030114
chr1:+:24020403-24022287
chr10:-:135176437-135177162
chr10:-:5043873-5052535
chr10:-:5048244-5048667
chr10:+:135351396-135352354
chr10:+:135352155-135352283
chr11:+:46755790-46760597
chr12:+:112237867-112247346
chr12:+:16500211-16507164
chr13:-:45911523-45912796
chr13:-:45911538-45912794
chr13:-:45913681-45914128
chr14:-:94847478-94854896
chr14:-:94849984-94854896
chr16:-:55844922-55850835
chr16:-:55850850-55853446
chr16:+:72090847-72091290
chr17:-:26694502-26695541
chr17:-:64212151-64212905
chr17:-:64213085-64219815
chr17:-:64219728-64219815
chr17:-:64219892-64224137
chr17:-:64222242-64224143
chr17:-:64224278-64225433
chr18:-:71920900-71928149
chr19:+:45409519-45409858
chr19:+:45418474-45422429
chr19:+:45422059-45422429
chr19:+:45451790-45451921
chr2:-:88424127-88425694
chr20:+:3615036-3615707
chr22:-:24313812-24315861
chr3:-:12881741-12882268
chr3:-:52853808-52854306
chr3:+:133475181-133475650
chr3:+:133489416-133490836
chr3:+:133496127-133497429
chr3:+:186445133-186456887
chr3:+:186459388-186459877
chr3:+:186459388-186460188
chr3:+:186459848-186461493
chr4:-:100229021-100231910
chr4:-:155528134-155530781
chr4:-:72611426-72611867
chr4:+:74274457-74275140
chr4:+:74274457-74276028
chr4:+:74274522-74275140
chr4:+:74275140-74276028
chr4:+:74275140-74283982
chr4:+:74279299-74283982
chr4:+:74282070-74283255
chr4:+:74283386-74283825
chr4:+:74283386-74285970
chr4:+:74284028-74284997
chr4:+:74284028-74285970
chr4:+:74286038-74286231
chr4:+:74286369-74286808
chr5:-:42804875-42811937
chr5:+:132202727-132203181
chr5:+:85915316-85916484
chr6:-:13632750-13634662
chr6:+:161159644-161162342
chr7:-:150493662-150496664
chr7:+:134215562-134217755
chr7:+:134217833-134221802
chr7:+:134223029-134225798
chr9:-:113007123-113018691
chr9:-:116822550-116823093
chr9:-:116825038-116828349
chr9:+:117085527-117085924
chr9:+:117087177-117087308
chr9:+:117093954-117094085
chrX:-:16870640-16870871

## Sheet: LIHC (Yang)
junc.id
chr1:-:120291689-120293419
chr1:-:120302612-120311363
chr1:-:155205098-155205471
chr1:-:161192296-161192707
chr1:-:161192369-161192707
chr1:-:161192775-161193139
chr1:-:161192840-161192947
chr1:-:161192840-161193056
chr1:-:161192840-161193135
chr1:-:161192840-161193170
chr1:-:161193086-161193139
chr1:-:161193247-161193384
chr1:-:173880029-173883690
chr1:-:179825305-179834570
chr1:-:182354691-182355496
chr1:-:182355537-182356325
chr1:-:225594534-225599038
chr1:-:228296022-228296849
chr1:-:228296022-228296961
chr1:-:230839075-230845740
chr1:-:235299082-235299348
chr1:+:150956545-150956777
chr1:+:154956542-154965188
chr1:+:155706854-155707956
chr1:+:196646797-196648773
chr1:+:196847565-196849801
chr1:+:197872249-197874925
chr1:+:207317338-207317891
chr1:+:215781487-215785166
chr1:+:226019614-226030114
chr1:+:226019660-226026917
chr1:+:226030175-226032251
chr1:+:226032324-226032791
chr1:+:231377202-231386709
chr10:-:135176437-135177162
chr10:-:135177280-135178161
chr10:-:5043873-5052535
chr10:-:5046206-5060091
chr10:-:5048244-5048667
chr10:-:5055812-5060091
chr10:-:73578481-73579221
chr10:-:95353654-95360149
chr10:-:95353792-95354369
chr10:-:95353792-95359873
chr10:-:95360074-95360149
chr10:-:95360256-95360350
chr10:-:95360256-95360546
chr10:-:95360503-95360674
chr10:-:95360803-95360930
chr10:-:97442937-97443278
chr10:+:135342144-135342721
chr10:+:135342144-135345627
chr10:+:135345358-135345627
chr10:+:135346372-135346639
chr10:+:135346756-135347259
chr10:+:135351396-135351967
chr10:+:135352155-135352283
chr10:+:7786810-7788626
chr11:-:116706631-116706967
chr11:-:116707127-116707794
chr11:-:116707829-116708060
chr11:-:116707865-116708060
chr11:-:118888255-118888991
chr11:-:1780869-1782559
chr11:-:61732915-61734783
chr11:-:62327299-62327540
chr11:-:6453247-6458278
chr11:-:6453247-6459585
chr11:-:6453247-6461394
chr11:-:6458407-6458765
chr11:-:6458407-6459585
chr11:+:116700656-116700913
chr11:+:116700656-116700957
chr11:+:116700656-116701270
chr11:+:116701048-116701285
chr11:+:116701048-116701291
chr11:+:116701068-116701291
chr11:+:116701353-116701497
chr11:+:116701353-116701522
chr11:+:116701595-116703479
chr11:+:116701680-116703479
chr11:+:116701815-116703479
chr11:+:116703336-116703479
chr11:+:129698148-129709447
chr11:+:46403531-46403606
chr11:+:46404011-46404187
chr11:+:46751003-46760597
chr11:+:46751115-46760597
chr11:+:64002972-64003382
chr12:-:122282086-122284767
chr12:-:122287696-122294229
chr12:-:53292303-53292456
chr12:+:112237867-112247346
chr12:+:16500211-16507164
chr12:+:16500644-16516728
chr12:+:6837477-6838466
chr13:-:45911523-45912796
chr14:-:94770940-94772071
chr14:-:94776343-94789603
chr14:-:94844977-94847207
chr14:-:94844977-94848928
chr14:-:94845011-94845800
chr14:-:94845948-94854896
chr14:-:94847478-94854896
chr14:-:94849578-94849758
chr14:-:94849578-94850370
chr14:-:94849578-94854892
chr14:-:94849984-94854896
chr14:-:94850464-94854896
chr15:-:45654419-45655802
chr15:-:64448341-64448923
chr15:+:41105100-41105546
chr16:-:2096364-2097709
chr16:-:55840532-55844428
chr16:-:55844919-55850835
chr16:-:55844922-55850835
chr16:-:55844922-55853446
chr16:-:55846955-55853446
chr16:-:55850850-55853446
chr16:+:83998841-83999418
chr17:-:26694502-26695541
chr17:-:26694987-26695541
chr17:-:26695166-26695541
chr17:-:26695686-26695892
chr17:-:26695686-26696309
chr17:-:26695694-26696309
chr17:-:26696872-26697160
chr17:-:37006716-37008856
chr17:-:4850111-4851557
chr17:-:64212151-64212905
chr17:-:64213085-64219815
chr17:-:64219728-64219815
chr17:-:64219892-64224137
chr17:-:64222242-64224143
chr17:-:64224278-64225433
chr17:-:7005515-7008852
chr17:-:7077168-7077279
chr17:-:79801968-79803436
chr17:-:79803618-79804304
chr17:-:79994184-79994419
chr17:-:79994184-79994596
chr17:-:79994343-79994419
chr17:-:79994347-79994419
chr17:-:79994519-79994605
chr17:-:79994549-79994596
chr17:+:1656084-1657423
chr17:+:31258420-31258498
chr17:+:41150488-41151949
chr18:-:71920900-71928149
chr18:+:29172989-29175065
chr18:+:29172989-29178530
chr18:+:29176851-29178530
chr19:-:39328291-39328424
chr19:-:3978005-3979326
chr19:-:39924185-39924304
chr19:-:49318398-49321996
chr19:-:58858395-58858792
chr19:-:58859006-58862756
chr19:-:58863053-58863642
chr19:-:58863053-58863840
chr19:-:58863544-58863648
chr19:-:58864563-58864769
chr19:-:6678028-6678162
chr19:-:6678028-6678201
chr19:-:6678298-6679135
chr19:-:6680274-6682152
chr19:-:6686913-6692934
chr19:-:6702590-6707476
chr19:-:6702851-6707086
chr19:+:34710478-34710613
chr19:+:45409098-45409873
chr19:+:45409098-45411016
chr19:+:45409301-45409858
chr19:+:45409331-45409858
chr19:+:45409441-45409858
chr19:+:45409519-45409858
chr19:+:45409688-45409858
chr19:+:45409781-45409858
chr19:+:45410375-45411016
chr19:+:45411209-45411737
chr19:+:45411215-45411789
chr19:+:45411939-45412321
chr19:+:45417990-45419446
chr19:+:45418206-45419452
chr19:+:45418474-45422429
chr19:+:45419482-45422513
chr19:+:45449332-45450295
chr19:+:45449332-45451957
chr19:+:45451790-45451921
chr19:+:49468866-49469063
chr19:+:49468866-49469537
chr19:+:49469663-49469803
chr19:+:49993179-49993496
chr19:+:49993554-49993736
chr19:+:49994804-49994987
chr19:+:49994804-49995000
chr19:+:50000011-50000450
chr19:+:54705149-54710143
chr19:+:55898061-55899302
chr19:+:8386458-8386539
chr2:-:127808488-127815048
chr2:-:88424127-88425694
chr2:+:201526354-201527579
chr2:+:234677085-234678180
chr2:+:241810866-241811117
chr2:+:241810866-241811230
chr2:+:241811341-241812395
chr2:+:97493637-97493840
chr20:+:35918089-35925749
chr20:+:3615036-3615707
chr20:+:47712737-47712885
chr20:+:57485456-57485739
chr21:+:46926522-46927474
chr22:-:37412808-37414178
chr22:+:21134489-21138373
chr22:+:37420793-37425256
chr3:-:52028142-52029101
chr3:-:52848082-52850899
chr3:-:52848379-52850698
chr3:-:52850830-52850899
chr3:-:52851074-52852477
chr3:-:52852540-52853408
chr3:-:52853534-52853955
chr3:-:52853808-52854306
chr3:-:52855137-52857571
chr3:-:52858890-52859901
chr3:+:133475181-133475650
chr3:+:133475853-133476337
chr3:+:133475853-133483025
chr3:+:133476790-133478024
chr3:+:133489416-133490836
chr3:+:133496082-133496496
chr3:+:133496127-133497429
chr3:+:149192621-149192761
chr3:+:186335139-186337645
chr3:+:186335139-186338374
chr3:+:186335164-186336324
chr3:+:186336280-186337645
chr3:+:186336426-186338883
chr3:+:186443049-186456887
chr3:+:186445133-186456887
chr3:+:186459388-186459877
chr3:+:186459388-186460188
chr3:+:186459848-186461493
chr3:+:52012390-52014851
chr3:+:52822082-52823668
chr3:+:52823870-52825532
chr3:+:52841932-52842155
chr3:+:52842318-52842567
chr4:-:100229021-100231910
chr4:-:155528731-155529617
chr4:-:155533041-155533169
chr4:-:155533050-155533542
chr4:-:39456599-39458025
chr4:-:72611426-72611867
chr4:+:190878657-190879441
chr4:+:74270049-74270832
chr4:+:74270890-74270976
chr4:+:74270890-74272367
chr4:+:74271056-74272345
chr4:+:74274457-74275140
chr4:+:74274457-74276028
chr4:+:74274522-74275092
chr4:+:74274522-74275140
chr4:+:74275140-74276028
chr4:+:74275140-74283982
chr4:+:74277842-74279151
chr4:+:74279299-74283982
chr4:+:74279351-74280772
chr4:+:74280881-74281972
chr4:+:74282070-74283255
chr4:+:74283386-74283825
chr4:+:74283386-74283916
chr4:+:74283386-74283982
chr4:+:74283852-74285223
chr4:+:74284028-74284930
chr4:+:74284028-74284997
chr4:+:74284028-74285970
chr4:+:74286038-74286231
chr5:-:149826526-149827036
chr5:-:34006004-34006921
chr5:-:42801433-42803937
chr5:-:42804875-42811937
chr5:+:132202727-132203188
chr5:+:179263369-179263470
chr6:-:11000151-11000319
chr6:-:13632750-13634662
chr6:-:30168900-30172432
chr6:-:31696761-31697827
chr6:-:33385863-33385978
chr6:-:52131491-52132662
chr6:+:133135921-133136154
chr6:+:133135921-133136156
chr6:+:161155120-161155859
chr6:+:161159644-161160108
chr6:+:161159644-161162342
chr6:+:24780968-24781714
chr6:+:29691304-29691459
chr6:+:31912634-31912756
chr6:+:31918180-31918644
chr6:+:31918721-31918922
chr6:+:33043918-33048465
chr6:+:33243660-33243717
chr6:+:33243843-33244167
chr6:+:44187519-44193797
chr6:+:44191378-44194996
chr7:-:150036168-150037188
chr7:-:150036170-150037524
chr7:-:150493662-150496664
chr7:-:2578980-2579177
chr7:-:99355851-99359663
chr7:-:99564909-99569368
chr7:-:99565912-99569368
chr7:+:134215562-134217755
chr7:+:134217833-134221470
chr7:+:134217833-134221802
chr7:+:134221524-134221829
chr7:+:150501560-150501919
chr7:+:27856109-27856508
chr8:-:17726483-17731527
chr8:-:74204631-74204923
chr8:-:99057627-99057739
chr8:+:87473549-87474006
chr9:-:104184186-104187029
chr9:-:104184212-104187124
chr9:-:104184787-104187124
chr9:-:113007123-113018691
chr9:-:116822550-116823093
chr9:-:116823357-116823703
chr9:-:116825036-116831978
chr9:-:116825038-116828349
chr9:-:116825038-116835204
chr9:-:116830715-116831978
chr9:-:116837316-116840372
chr9:-:130697593-130698831
chr9:-:130698934-130700096
chr9:-:140078234-140079364
chr9:+:117085527-117085924
chr9:+:117086085-117086301
chr9:+:117087177-117087308
chr9:+:117093954-117094085
chr9:+:37432135-37432533
chrX:-:108926601-108976367
chrX:-:108926604-108976367
chrX:-:132834056-132834644
chrX:-:132834737-132887508
chrX:-:133087232-133119301

## Sheet: MESO (Meiler)
junc.id
chr1:-:11709931-11710022
chr1:-:153507303-153507677
chr1:-:153507836-153508592
chr1:-:160846606-160850377
chr1:-:160849173-160850377
chr1:-:160849178-160850377
chr1:-:160849204-160849688
chr1:-:160849204-160850130
chr1:-:160850202-160850377
chr1:-:160850498-160851746
chr1:-:160851078-160851746
chr1:-:160851129-160851746
chr1:-:160851994-160852599
chr1:-:160854673-160854846
chr1:-:160917822-160920342
chr1:-:160921080-160921196
chr1:-:17302176-17302995
chr1:-:20305362-20306072
chr1:+:24020403-24022287
chr1:+:26607423-26607519
chr1:+:44019043-44019162
chr1:+:44069524-44069620
chr1:+:44446629-44446780
chr10:-:73577233-73577324
chr10:-:75006557-75006767
chr10:+:124267601-124268171
chr11:+:64010116-64010670
chr11:+:67351640-67351967
chr12:-:132682757-132683718
chr12:-:132683814-132685678
chr12:-:15037179-15038683
chr12:+:53689725-53690002
chr12:+:56552199-56552467
chr12:+:56552495-56553378
chr12:+:56552495-56553808
chr12:+:56554454-56555172
chr13:-:38144806-38148708
chr13:-:45911523-45912796
chr14:+:105180732-105180844
chr14:+:24649112-24649224
chr15:-:58306196-58306401
chr15:-:83952841-83953281
chr15:+:44084553-44085172
chr15:+:45007839-45008512
chr15:+:45008554-45008670
chr15:+:45009710-45009804
chr15:+:45722853-45722936
chr15:+:69745359-69745672
chr15:+:73596592-73596686
chr15:+:74228172-74235194
chr16:+:29816047-29816134
chr16:+:30996618-30996977
chr16:+:30997145-30997743
chr16:+:334792-334973
chr16:+:335015-335505
chr16:+:336735-336814
chr16:+:71417928-71423651
chr16:+:71418739-71419484
chr16:+:71419551-71421121
chr16:+:817470-818402
chr16:+:818565-818820
chr17:-:26694987-26695541
chr17:-:46621109-46621255
chr17:-:48264879-48266352
chr17:-:48267093-48267687
chr17:-:48267441-48268751
chr17:-:48269183-48269861
chr17:-:48270054-48271933
chr17:-:79801968-79803436
chr17:+:49243042-49243181
chr17:+:49243962-49244187
chr17:+:73752919-73753023
chr19:-:3978005-3979326
chr19:-:6678028-6678162
chr19:-:6678298-6679135
chr19:-:6679217-6679417
chr19:+:16204563-16212075
chr19:+:18684558-18685681
chr19:+:2269883-2271383
chr19:+:2271075-2271383
chr19:+:2271473-2271780
chr19:+:42364671-42364844
chr19:+:49994804-49994987
chr19:+:50000819-50002768
chr19:+:50000852-50001010
chr19:+:54710330-54710479
chr19:+:54710330-54711238
chr2:-:106001398-106002817
chr2:-:56097633-56097854
chr2:+:189875554-189876353
chr2:+:85133241-85133489
chr20:-:23614632-23615890
chr20:-:2776062-2776466
chr20:-:43881788-43882207
chr20:-:46290640-46292196
chr20:+:36150835-36151068
chr20:+:57485456-57485739
chr20:+:62369852-62369970
chr21:-:43802343-43804078
chr21:-:43802934-43803141
chr21:-:43804122-43805549
chr22:-:21383733-21385119
chr3:-:124802896-124803153
chr3:-:124826970-124827758
chr3:-:124829179-124829255
chr3:-:196735833-196736488
chr3:-:196749902-196751173
chr3:+:112066270-112066404
chr3:+:118906822-118909855
chr3:+:118913245-118922763
chr3:+:129023332-129023431
chr3:+:186708676-186756529
chr3:+:191075177-191075786
chr3:+:51737889-51738056
chr4:-:57897502-57899360
chr4:+:110605705-110606406
chr4:+:110605802-110606422
chr4:+:8608620-8608993
chr5:-:149782814-149784242
chr5:-:149785875-149786443
chr5:-:151043158-151043647
chr5:-:81572337-81573513
chr5:+:115230305-115230783
chr6:+:30459430-30460317
chr6:+:31914383-31915124
chr6:+:31919250-31919313
chr6:+:31995709-31995892
chr6:+:53784138-53784295
chr7:-:100875796-100875875
chr7:-:100876001-100877558
chr7:-:100877712-100880645
chr7:-:100881065-100881218
chr7:-:140154208-140154261
chr7:-:150036170-150037524
chr7:+:100160305-100160506
chr7:+:100210225-100210352
chr7:+:129939244-129939689
chr7:+:129944419-129945660
chr7:+:29603993-29605805
chr7:+:29605369-29605805
chr7:+:30962259-30963138
chr7:+:76144473-76144640
chr8:-:77896429-77898422
chr8:-:99057627-99057739
chr8:+:70514064-70515834
chr8:+:70515548-70515834
chr8:+:70571624-70572085
chr8:+:97533753-97605707
chr9:-:19376587-19378365
chr9:-:19378916-19379460
chr9:+:126134594-126135412
chr9:+:35675928-35676153
chr9:+:35679339-35679901
chrX:-:153578155-153578398
chrX:+:152768024-152770078
chrX:+:152768028-152770078
chrX:+:47444414-47445919

## Sheet: PRAD (Ku)
junc.id
chr1:-:153507303-153507677
chr1:-:153507836-153508592
chr1:-:156260151-156260748
chr1:-:20303663-20304507
chr1:-:20303673-20304507
chr1:-:207196825-207200838
chr1:-:207196825-207205923
chr1:-:207198409-207206051
chr1:-:207201024-207206051
chr1:-:21926050-21928176
chr1:-:6253108-6257711
chr1:+:155294969-155295205
chr1:+:155296923-155297943
chr1:+:162532374-162535801
chr1:+:222794634-222796648
chr1:+:24020403-24022287
chr1:+:46651400-46651430
chr1:+:53676922-53678935
chr1:+:93300470-93301757
chr1:+:93300470-93306107
chr10:-:52279681-52339463
chr10:-:73577459-73578373
chr10:-:81319262-81319684
chr10:-:98281573-98281641
chr10:+:135193900-135194963
chr10:+:79794179-79795109
chr10:+:79797199-79800372
chr11:-:118888255-118888991
chr11:-:134064629-134072710
chr11:-:17096744-17097135
chr11:-:17097119-17098714
chr11:-:4703991-4706547
chr11:-:4703991-4714526
chr11:-:4706711-4718882
chr11:-:4714924-4718882
chr11:-:49175461-49175779
chr11:-:49207326-49208195
chr11:-:49228426-49230109
chr11:-:49229447-49230109
chr11:-:62327299-62327540
chr11:-:66453300-66453868
chr11:+:117070148-117071433
chr11:+:117070148-117073727
chr11:+:117070148-117074497
chr11:+:117073909-117074112
chr11:+:129685793-129709447
chr11:+:4665260-4676143
chr11:+:4673886-4673967
chr11:+:62439337-62439427
chr12:-:118627746-118636828
chr12:-:121712388-121730954
chr12:-:15037179-15038683
chr12:-:53298811-53301039
chr12:-:54668093-54673791
chr12:-:57032980-57033763
chr12:-:57113380-57118235
chr12:+:111655741-111656743
chr12:+:124177270-124179766
chr12:+:53689725-53690237
chr12:+:56510583-56510977
chr12:+:56510583-56510981
chr12:+:56552495-56553378
chr12:+:56554104-56555172
chr13:-:24384063-24400469
chr13:-:24384063-24408194
chr13:-:45911523-45912796
chr13:-:45911538-45912794
chr13:-:45913681-45914128
chr13:-:76100764-76104249
chr13:-:95887088-95898531
chr14:-:60612385-60616070
chr14:-:74454875-74455027
chr14:-:74454875-74463352
chr15:-:45803482-45814225
chr15:-:64448341-64448923
chr15:+:44060795-44062447
chr16:-:20634894-20635451
chr16:-:20635537-20638510
chr16:-:20638638-20651782
chr16:-:20638638-20673115
chr16:-:20681305-20682852
chr16:-:20696587-20702318
chr16:-:27238157-27241802
chr16:+:68386218-68387297
chr16:+:68386218-68387394
chr16:+:85839470-85840365
chr16:+:89627776-89628003
chr17:-:62496444-62498127
chr17:-:79801248-79801334
chr17:-:79801968-79803436
chr17:-:8281010-8285460
chr18:-:47015920-47016897
chr18:+:52495931-52529250
chr18:+:52529454-52544797
chr19:-:3978005-3979326
chr19:-:39924185-39924304
chr19:+:2269883-2271383
chr19:+:35532776-35533074
chr19:+:35532776-35533164
chr19:+:35532776-35533373
chr19:+:35532776-35540193
chr19:+:35540420-35550581
chr19:+:35551073-35551263
chr19:+:35556249-35556528
chr19:+:35556936-35557213
chr19:+:35613743-35613808
chr19:+:45322885-45323961
chr19:+:49993179-49993496
chr19:+:49993554-49993736
chr19:+:49994804-49994987
chr19:+:49994804-49995000
chr19:+:49999728-50000776
chr19:+:50000011-50000450
chr19:+:50000064-50000450
chr19:+:50000852-50002768
chr19:+:51358213-51359495
chr19:+:51358213-51359589
chr19:+:51358240-51359481
chr19:+:51358240-51359495
chr19:+:51358240-51359566
chr19:+:51358257-51358738
chr19:+:51358257-51359566
chr19:+:51359655-51359962
chr19:+:51359655-51361290
chr19:+:51359655-51361314
chr19:+:51359655-51361389
chr19:+:51359655-51361399
chr19:+:51359655-51361418
chr19:+:51361569-51361714
chr19:+:51361571-51361694
chr19:+:51361851-51362025
chr19:+:51361851-51362536
chr19:+:51361851-51362722
chr19:+:51361851-51362734
chr19:+:51361851-51362819
chr19:+:51361851-51362849
chr19:+:51361851-51363035
chr19:+:51361851-51363270
chr19:+:51361888-51363227
chr19:+:51362236-51362273
chr19:+:51376775-51379733
chr19:+:51378136-51378209
chr19:+:51379932-51380127
chr19:+:51380012-51380127
chr19:+:51380014-51381659
chr19:+:51380058-51380140
chr19:+:51380087-51381659
chr19:+:51380264-51380899
chr19:+:51380264-51380966
chr19:+:51380264-51381702
chr19:+:51380301-51380959
chr19:+:51380301-51380966
chr19:+:51380301-51381764
chr19:+:51380590-51381659
chr19:+:54705149-54710143
chr19:+:54710330-54710479
chr19:+:54710330-54711238
chr19:+:54710330-54711278
chr19:+:55898039-55899297
chr19:+:55898061-55899302
chr19:+:5690345-5690516
chr19:+:5691468-5691542
chr19:+:8386458-8386539
chr19:+:8386979-8387155
chr2:-:192815133-192820980
chr2:-:192854276-192862987
chr2:-:192995559-193044393
chr2:-:238484151-238485899
chr2:-:242169663-242170173
chr2:-:25781276-25799706
chr2:+:130939974-130940199
chr2:+:136540453-136541078
chr2:+:200824603-200826549
chr2:+:234878425-234878853
chr2:+:235949681-235950005
chr2:+:39893514-39944149
chr2:+:55459768-55459943
chr2:+:55462098-55462545
chr2:+:55462098-55462548
chr2:+:74137968-74140611
chr20:-:17640189-17640249
chr20:-:33342635-33345022
chr20:-:33342638-33345022
chr20:+:35173073-35173261
chr20:+:35173471-35176439
chr20:+:36572021-36572382
chr20:+:45354963-45355521
chr20:+:57485456-57485739
chr21:-:38334470-38352940
chr21:-:43732656-43733594
chr21:-:43733741-43735404
chr21:-:46952062-46957680
chr22:-:36007153-36019237
chr22:-:39709315-39710111
chr22:+:25019883-25023437
chr3:-:52028142-52029101
chr3:+:127387427-127387983
chr3:+:132036420-132050490
chr3:+:132063903-132065892
chr3:+:169800546-169801692
chr3:+:184033644-184033923
chr3:+:39449277-39452244
chr4:-:1193835-1202363
chr4:-:1195161-1198769
chr4:-:1195250-1202363
chr4:-:1196948-1198769
chr4:-:1201049-1201667
chr4:-:1201947-1202363
chr4:-:1202549-1202682
chr4:-:141560582-141563110
chr4:-:39458098-39459205
chr4:-:57832893-57834549
chr4:-:71686578-71691012
chr4:+:152024231-152025623
chr4:+:156629446-156634249
chr4:+:72222877-72263293
chr4:+:72368548-72397778
chr4:+:77637563-77651956
chr4:+:95546159-95561426
chr5:-:130498338-130500787
chr5:-:180664712-180665098
chr5:-:33987409-33988258
chr5:-:33993480-33998745
chr5:-:33994158-33998745
chr5:-:33998932-34003919
chr5:-:34004817-34005860
chr5:-:34006004-34006340
chr5:-:34006004-34006456
chr5:-:34006004-34006703
chr5:-:34006004-34006921
chr5:-:34007194-34007877
chr5:-:40834367-40834574
chr5:+:127477673-127478817
chr5:+:85915316-85916484
chr6:-:134337401-134349518
chr6:-:31237162-31237271
chr6:-:31323034-31323093
chr6:-:46684833-46703286
chr6:-:46684833-46703354
chr6:-:46690662-46703354
chr6:-:74227628-74227752
chr6:-:74228951-74229605
chr6:-:74229779-74230084
chr6:+:138531178-138544858
chr6:+:138545185-138550920
chr6:+:33243660-33243717
chr6:+:33243843-33244167
chr6:+:35436373-35436575
chr7:-:110603621-111057314
chr7:-:72987275-72987649
chr7:-:99565912-99569368
chr7:-:99566053-99567942
chr7:+:24323894-24324404
chr7:+:24325047-24329101
chr7:+:75932393-75933123
chr7:+:7607115-7607656
chr7:+:7628194-7629043
chr8:-:146015811-146016661
chr8:-:74204631-74204923
chr8:-:77896429-77898422
chr8:-:99057627-99057739
chr8:+:145584153-145584260
chr8:+:87410708-87410803
chr9:-:130211987-130213559
chr9:-:130213083-130213563
chr9:-:139934097-139934182
chr9:-:139934336-139934422
chr9:-:139934888-139934963
chr9:-:139935156-139935265
chr9:-:19376587-19378365
chr9:-:19378916-19379460
chr9:-:19379597-19380187
chr9:-:85620415-85624555
chr9:-:88655780-88661384
chr9:+:117390530-117399269
chr9:+:117405679-117405811
chr9:+:136217174-136217427
chrX:-:118923962-118925536
chrX:-:153578155-153578398
chrX:-:71493258-71493650
chrX:-:71495024-71495393
chrX:+:153627454-153627678
chrX:+:153627737-153627835
chrX:+:16996804-17024343
chrX:+:38660740-38661787

## Sheet: STAD (Joung)
junc.id
chr1:-:111662581-111663266
chr1:-:111737348-111738289
chr1:-:120341219-120342347
chr1:-:120341225-120345690
chr1:-:120345788-120354031
chr1:-:120351478-120354031
chr1:-:153507303-153507677
chr1:-:153948381-153949645
chr1:-:155142333-155145696
chr1:-:207104070-207104841
chr1:-:212002665-212003524
chr1:-:220233133-220240643
chr1:-:220253196-220263159
chr1:-:235299082-235299348
chr1:-:31479946-31501642
chr1:-:45984726-45987306
chr1:-:51912777-51913606
chr1:-:6246770-6252989
chr1:-:6246876-6257711
chr1:-:85733632-85736300
chr1:-:85733649-85736300
chr1:-:9811720-9833329
chr1:+:100742872-100750795
chr1:+:10555378-10579859
chr1:+:12262228-12266793
chr1:+:150432793-150443036
chr1:+:150443456-150444358
chr1:+:15541739-15545821
chr1:+:156164038-156165803
chr1:+:156165964-156169625
chr1:+:173814429-173822486
chr1:+:207512762-207513731
chr1:+:22963195-22964082
chr1:+:236332055-236343178
chr1:+:24020403-24022287
chr1:+:244849971-244855180
chr1:+:244852644-244855185
chr1:+:40869418-40872407
chr1:+:89250459-89251786
chr1:+:93300470-93306107
chr10:-:119078485-119133866
chr10:-:12212769-12214763
chr10:-:12214865-12219791
chr10:-:126677954-126678070
chr10:-:129676684-129690819
chr10:-:22862386-22896855
chr10:-:73577233-73577324
chr10:-:73577459-73578373
chr10:-:75006557-75006767
chr10:+:112679415-112745385
chr10:+:135163665-135165510
chr10:+:24813660-24816864
chr10:+:24822166-24831621
chr10:+:60121161-60123368
chr10:+:64910116-64911909
chr10:+:72575882-72604229
chr10:+:72580056-72604229
chr10:+:79794179-79795109
chr10:+:79798033-79799961
chr10:+:95259842-95262858
chr10:+:95259842-95262869
chr10:+:95259991-95262858
chr11:-:102391535-102395666
chr11:-:104827422-104839245
chr11:-:17515923-17518045
chr11:-:17518360-17519065
chr11:-:17523527-17533448
chr11:-:17533601-17538947
chr11:-:36296322-36298638
chr11:-:3789974-3793004
chr11:-:62327299-62327540
chr11:-:62339373-62341302
chr11:-:63411733-63419407
chr11:-:67267298-67267384
chr11:-:74168648-74178442
chr11:+:117070148-117071433
chr11:+:117070148-117073727
chr11:+:12229686-12234801
chr11:+:129685793-129720444
chr11:+:129698148-129709447
chr11:+:1901454-1904648
chr11:+:2924719-2937851
chr11:+:45827887-45829686
chr11:+:45830121-45832326
chr11:+:61135470-61136071
chr11:+:65403274-65403421
chr11:+:66264948-66276549
chr11:+:66276785-66276881
chr11:+:67351640-67351967
chr11:+:86048572-86055704
chr11:+:8705464-8705552
chr12:-:118627746-118636828
chr12:-:31451158-31478769
chr12:-:50384126-50385780
chr12:-:50410502-50419155
chr12:-:51640612-51663028
chr12:-:53292303-53292456
chr12:-:53298811-53301039
chr12:+:111884837-111884925
chr12:+:112237867-112247346
chr12:+:113405985-113407412
chr12:+:54676449-54677595
chr12:+:54677751-54678023
chr12:+:56510443-56510537
chr12:+:56510583-56510981
chr12:+:56552199-56552467
chr12:+:69742662-69743887
chr12:+:6979300-6979405
chr13:-:41556418-41556993
chr13:-:45911523-45912796
chr13:-:45911538-45912794
chr13:-:45913681-45914128
chr13:-:46549973-46550316
chr13:-:46550400-46553947
chr13:-:53003567-53007796
chr13:+:113530255-113536126
chr13:+:27827980-27830320
chr14:+:21249287-21249400
chr14:+:54875507-54878204
chr14:+:55609467-55611812
chr15:-:23021429-23026021
chr15:-:25599573-25601038
chr15:-:51000071-51014320
chr15:-:64448341-64448923
chr15:-:75216111-75230255
chr15:+:41643345-41648236
chr15:+:44060795-44062447
chr15:+:66729230-66736993
chr16:-:18823446-18826496
chr16:-:28145251-28146536
chr16:-:2822103-2823754
chr16:-:2823834-2825451
chr16:-:4862249-4864537
chr16:-:58562509-58564149
chr16:-:70725952-70726723
chr16:+:14726875-14731795
chr16:+:19460953-19474601
chr16:+:30996618-30996977
chr16:+:3115495-3115638
chr16:+:3115656-3115781
chr16:+:3118240-3118729
chr16:+:587298-596816
chr16:+:66400661-66402545
chr16:+:82123838-82124506
chr17:-:1057531-1082960
chr17:-:15969008-15973478
chr17:-:37829119-37830245
chr17:-:41607320-41607489
chr17:-:41620414-41622342
chr17:-:57775339-57784740
chr17:-:60032928-60033699
chr17:-:62496444-62498127
chr17:-:7164293-7165139
chr17:-:73144707-73150436
chr17:-:8281010-8285460
chr17:+:30807649-30808328
chr17:+:38412774-38418776
chr17:+:41150488-41151949
chr17:+:45000635-45006885
chr17:+:45975293-45992677
chr17:+:61678722-61681896
chr17:+:66244227-66244784
chr17:+:72199875-72200056
chr17:+:72439447-72439956
chr17:+:72998323-72999304
chr17:+:80713192-80714040
chr18:-:33611060-33647216
chr18:+:29078259-29089260
chr19:-:19770633-19770706
chr19:-:39294535-39299383
chr19:-:3976769-3977212
chr19:-:39924185-39924304
chr19:-:39924401-39924939
chr19:-:46227143-46234106
chr19:-:50413141-50432673
chr19:-:8032584-8038608
chr19:+:17970783-17972902
chr19:+:17972116-17972902
chr19:+:18286507-18287958
chr19:+:19538801-19576148
chr19:+:2269883-2271383
chr19:+:35607263-35611981
chr19:+:35609503-35610071
chr19:+:35613743-35613808
chr19:+:36139305-36145472
chr19:+:42213742-42218889
chr19:+:42213958-42221373
chr19:+:42213958-42221376
chr19:+:42221652-42222097
chr19:+:42224127-42231153
chr19:+:42225096-42233103
chr19:+:42231272-42233170
chr19:+:42231276-42233103
chr19:+:42266131-42270094
chr19:+:42266131-42274706
chr19:+:49993833-49994329
chr19:+:49994804-49994987
chr19:+:49999728-50000776
chr19:+:5690345-5690516
chr19:+:761232-761624
chr19:+:8386458-8386539
chr19:+:8386979-8387155
chr2:-:158656012-158674780
chr2:-:27294331-27294473
chr2:-:32108531-32142994
chr2:-:69590802-69601137
chr2:-:96922302-96930875
chr2:+:182761350-182761634
chr2:+:187490314-187495526
chr2:+:189875554-189876353
chr2:+:219294673-219295447
chr2:+:223799405-223806218
chr2:+:232577226-232577498
chr2:+:32517417-32526450
chr2:+:55462098-55462545
chr2:+:55462098-55462548
chr2:+:74056123-74071939
chr2:+:85133241-85133394
chr2:+:85133241-85133489
chr2:+:85822972-85824029
chr20:-:33703736-33705500
chr20:-:33705656-33706400
chr20:-:33714178-33725682
chr20:-:33714178-33730175
chr20:-:46290640-46292196
chr20:-:46294700-46295003
chr20:-:6100386-6103420
chr20:+:1896101-1905409
chr20:+:30327424-30345209
chr20:+:30330450-30345212
chr20:+:32619410-32666310
chr20:+:34802362-34809785
chr20:+:34806884-34809785
chr20:+:43604051-43607083
chr20:+:43804850-43805010
chr20:+:44443109-44444492
chr21:-:43732379-43735402
chr21:+:34717666-34720855
chr21:+:34726089-34727636
chr22:-:50905877-50905969
chr22:-:50967039-50967609
chr22:+:41537226-41543840
chr3:-:122084313-122087022
chr3:-:125168255-125170148
chr3:-:12881741-12882268
chr3:-:179306783-179311552
chr3:-:194176691-194180199
chr3:-:52028142-52029101
chr3:-:52558627-52558978
chr3:-:58639526-58641277
chr3:+:142371439-142383043
chr3:+:195456610-195460059
chr3:+:39449277-39452244
chr3:+:39449312-39450096
chr3:+:39450215-39453139
chr3:+:52012098-52014408
chr3:+:52012390-52014851
chr3:+:52021640-52022781
chr4:-:140217110-140223569
chr4:-:39929784-39933080
chr4:-:47455231-47458599
chr4:-:57897502-57899360
chr4:-:77045909-77065301
chr4:+:109541756-109543260
chr4:+:141264862-141286801
chr4:+:141264862-141286836
chr4:+:141286896-141300274
chr4:+:152024231-152025623
chr4:+:25258296-25260673
chr4:+:57318218-57325537
chr5:-:149826526-149829265
chr5:-:43307946-43313457
chr5:-:60457054-60458272
chr5:-:60458183-60458272
chr5:-:96139642-96143562
chr5:+:139568767-139574030
chr5:+:139616345-139622889
chr5:+:151151593-151166132
chr5:+:162864674-162864774
chr5:+:252963-254507
chr5:+:85915316-85916484
chr5:+:96058402-96064856
chr6:-:132824727-132833665
chr6:-:150141839-150157220
chr6:-:17640277-17646297
chr6:-:18131011-18134034
chr6:-:30635985-30638186
chr6:-:30899323-30899483
chr6:-:31236940-31237742
chr6:-:31322299-31322405
chr6:-:31322326-31322409
chr6:-:31322471-31322883
chr6:-:31698780-31699786
chr6:-:33036984-33037417
chr6:-:34392632-34392848
chr6:-:8430390-8435671
chr6:+:143656256-143660775
chr6:+:158993500-158994451
chr6:+:26373265-26373503
chr6:+:30460213-30460294
chr6:+:32605302-32609086
chr6:+:33243660-33243717
chr6:+:33243843-33244167
chr6:+:34940420-34949466
chr6:+:35314927-35320705
chr6:+:35436216-35436373
chr6:+:35436373-35436575
chr6:+:35437306-35438024
chr6:+:43487576-43487806
chr6:+:47494476-47501337
chr6:+:47544326-47544744
chr7:-:128658211-128659924
chr7:-:137613112-137620615
chr7:-:16835401-16837254
chr7:-:16839441-16844558
chr7:-:16841427-16842689
chr7:-:16899255-16901007
chr7:-:16920379-16921567
chr7:-:2275199-2279164
chr7:-:2296655-2296999
chr7:-:32919554-32927588
chr7:-:35058208-35076708
chr7:-:47409218-47420401
chr7:-:47512919-47520700
chr7:-:56170704-56174056
chr7:-:73151021-73151267
chr7:+:100210225-100210352
chr7:+:116364218-116364825
chr7:+:129008009-129008310
chr7:+:23300392-23301100
chr7:+:23347568-23348978
chr7:+:32609778-32612810
chr7:+:36459076-36459777
chr7:+:44836392-44840885
chr7:+:44839079-44840885
chr7:+:44839479-44840885
chr7:+:92021606-92025696
chr8:-:101965377-101965496
chr8:-:144875510-144876069
chr8:-:95143220-95160971
chr8:-:95183213-95188768
chr8:-:95206933-95214647
chr8:-:95214953-95220710
chr8:-:99055003-99057342
chr8:+:145582725-145582847
chr8:+:145724223-145724322
chr8:+:26151256-26196408
chr8:+:64081373-64081945
chr8:+:98703416-98708431
chr8:+:98708521-98711981
chr9:-:100887187-100888924
chr9:-:111849622-111855754
chr9:-:113007123-113018691
chr9:-:115030475-115060120
chr9:-:130213083-130213563
chr9:-:130885413-130886004
chr9:-:139757178-139757357
chr9:-:139757451-139757793
chr9:-:19376587-19378365
chr9:-:19378916-19379460
chr9:+:130911942-130912522
chr9:+:130913201-130913916
chr9:+:130913271-130913916
chr9:+:130913402-130913916
chr9:+:130913521-130913916
chr9:+:130914563-130915249
chr9:+:131267183-131269494
chr9:+:134334743-134340152
chr9:+:136217174-136217427
chr9:+:33750732-33796640
chr9:+:33796800-33797928
chr9:+:38392804-38394473
chr9:+:71355143-71357416
chrX:-:108926604-108976367
chrX:-:119670889-119671972
chrX:-:153706397-153706644
chrX:-:71495024-71495393
chrX:-:84601003-84606355
chrX:+:100646333-100646446
chrX:+:16738022-16753387
chrX:+:48340894-48341050
